# Supplementary material for: DNA methylation dynamics at imprinted genes during bovine pre-implantation embryo development
Source: PubMed Central journal article supplement (PMC4363183; doi:10.1186/s12861-015-0060-2), 2015-03-10
Supplement: 12861_2015_60_MOESM1_ESM.pdf [file 12861_2015_60_MOESM1_ESM.pdf]

Table S2. Bisulfite PCR pyrosequencing primers used in this study.

| Gene                 | Primer            | Sequence 5'-3'                          | Annealing Temp (°C) | Accession number |
|----------------------|-------------------|-----------------------------------------|---------------------|------------------|
| <i>SNRPN</i> *       | pyro fwd          | TGA TTA TAG GGG TGG GGT AGA TAT TA      | 59                  | NM 001079797     |
|                      | pyro rvs (biotin) | CAC CAC TCC CCA AAC TCC CCC TAA ACA TAC | 59                  |                  |
|                      | pyro-seq          | GGT TTT TTT GTT TGA GAG A               |                     |                  |
| <i>MEST</i> *        | pyro fwd          | GGT ATT ATT GGG GTT TTT ATA TTG TGA T   | 55                  | NM 001083368     |
|                      | pyro rvs (biotin) | CCA ACA CCT CCT AAA TCC CTA ACT A       | 55                  |                  |
|                      | pyro-seq          | GGT GTT GGG AGT GGG TA                  |                     |                  |
| <i>IGF2R</i> *       | pyro fwd          | GAG AGG GTA GGA GTT AGA GTA GAA ATT TT  | 57                  | NM 174352        |
|                      | pyro rvs (biotin) | CAC CTT ACT CAA AAC CTA CCA AC          | 57                  |                  |
|                      | pyro-seq          | TTG GGT AGG GGG TTT                     |                     |                  |
| <i>PLAGL1 /ZAC</i> * | pyro fwd          | GTT TGG GGA GGT ATT TAT AGG TTG AA      | 57                  | NM 001103289     |
|                      | pyro rvs (biotin) | TCC CCA ACC AAA CCT CCT CCT AC          | 57                  |                  |
|                      | pyro-seq          | AGG TTG AAT GAT AAA TGG                 |                     |                  |
| <i>PEG10</i> *       | pyro fwd (biotin) | GTT TGG TAT AGG TGT GGG ATT T           | 56                  | NM 001172518     |
|                      | pyro rvs          | TCA AAA CCC TAA AAA CTT AAA TTC TC      | 56                  |                  |
|                      | pyro-seq          | CCA CCC AAT TTT AAA ATA CAA CCA         |                     |                  |
| <i>H19</i> †         | pyro fwd (biotin) | TTT TGT GGA TTA TTG TGG TAT T           | 52                  | NR 003958        |
|                      | pyro rvs          | ATC TTA AAC TAA TCT CCC AAC CC          | 52                  |                  |
|                      | pyro-seq          | CTA CAC ACC ACA AAA T                   |                     |                  |

Pyrosequencing assays for maternally imprinted gene differentially methylated regions (\*) were described previously [11]. For *H19* (†), a pyrosequencing assay was designed in accordance to the genomic sequence described by Curchoe et al. [52].
