# Supplementary material for: DNA methylation dynamics at imprinted genes during bovine pre-implantation embryo development
Source: PubMed Central journal article supplement (PMC4363183; doi:10.1186/s12861-015-0060-2), 2015-03-10
Supplement: 12861_2015_60_MOESM2_ESM.pdf [file 12861_2015_60_MOESM2_ESM.pdf]

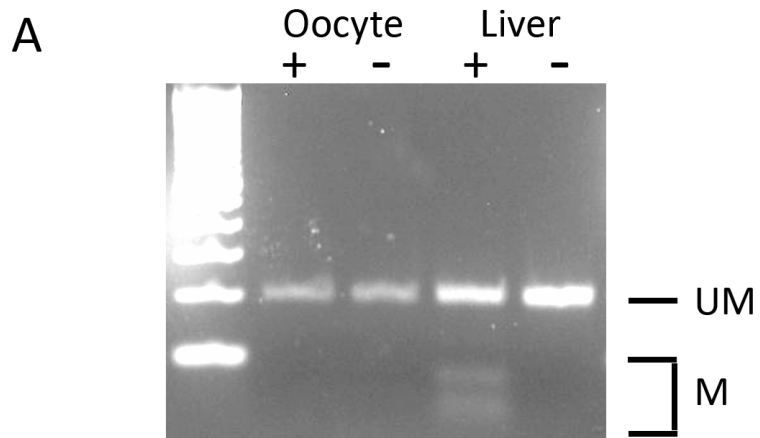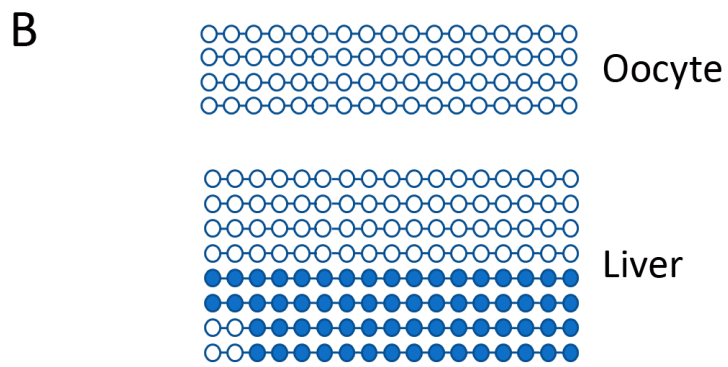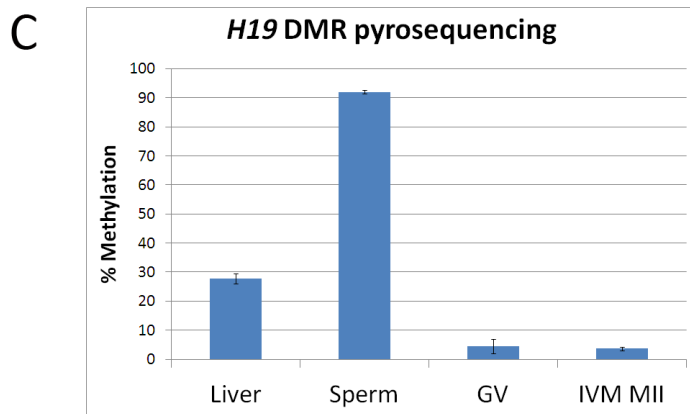

**Figure S1.** Verification of the bovine *H19* differentially methylated region.

To confirm the methylation status of the *H19* DMR included in this investigation it was analysed using three techniques. Combined Bisulfite Restriction Analysis (A) and bisulfite sequencing show that this DMR is hypomethylated in the oocyte and hemi-methylated in liver. Pyrosequencing analysis of the same region confirmed these observations in oocytes and liver and also illustrated that *H19* is hypermethylated in sperm DNA.
