# Supplementary material for: DNA methylation dynamics at imprinted genes during bovine pre-implantation embryo development
Source: PubMed Central journal article supplement (PMC4363183; doi:10.1186/s12861-015-0060-2), 2015-03-10
Supplement: 12861_2015_60_MOESM3_ESM.pdf [file 12861_2015_60_MOESM3_ESM.pdf]

Table S1. Individual methylation values for imprinted gene DMRs during bovine pre-implantation embryo development.

| Sample | Group | <i>IGF2R</i> | <i>PEG10</i> | <i>MEST</i> | <i>SNRPN</i> | <i>PLAGL1</i> | <i>H19</i> |
|--------|-------|--------------|--------------|-------------|--------------|---------------|------------|
| d7 1   | 1     | 40.8±5.6     | 62.8±12.3    |             | 27.7±7.8     |               | 31.4±6.0   |
| d7 2   | 1     | 16.2±5.9     | 20.5±10.8    |             | 25.7±10.0    | 22.4±1.4      |            |
| d7 3   | 1     | 35.7±3.3     |              |             | 61.4±12.9    | 56.3±8.7      |            |
| d7 4   | 1     | 17.5±2.5     | 15.5±9.2     |             | 49.4±8.4     | 14.8±1.5      | 26.1±5.5   |
| d7 5   | 1     | 17.9±3.2     | 30.3±5.0     | 7.2±2.2     | 32.4±10.3    | 11.8±1.4      |            |
| d7 6   | 1     | 13.3±7.2     | 35.8±16.4    | 8.1±2.9     | 17.5±10.6    | 12.0±3.2      |            |
| d7 7   | 1     | 43.8±15.2    | 57.8±7.7     | 59.1±5.7    |              | 62.7±20       |            |
| d7 8   | 1     |              | 4.5±1.6      |             | 2.5±1.8      | 38.9±2.3      | 32.5±5.0   |
| d7 9   | 1     | 35.4±22.9    | 42.9±15.3    | 12.4±25.9   | 2.9±2.2      | 63.8±3.7      | 20.5±4.6   |
| d7 10  | 1     | 39.4±12.8    | 42.0±8.5     | 57.3±22.5   | 24.1±2.8     | 47.9±2.9      |            |
| d14 1  | 2     | 66.1±10.4    | 36.9±4.9     | 35.6±9.7    | 45.4±4.8     | 31.8±2.8      | 31.1±3.6   |
| d14 2  | 2     | 89.4±14.7    | 22.4±7.6     |             | 26.5±4.7     |               | 38.6±7.7   |
| d14 3  | 2     | 31.7±7.5     | 35.3±7.9     |             | 31.7±3.2     | 34.5±3.8      | 27.8±3.9   |
| d14 4  | 2     | 28.1±3.7     | 30.9±7.5     |             | 31.4±3.8     | 33.5±2.9      | 31.6±4.3   |
| d14 5  | 2     | 38.2±7.1     | 32.3±7.6     | 31.1±4.4    | 36.4±3.9     | 31.3±3.4      | 28.6±4.1   |
| d14 6  | 2     | 33.0±5.2     | 25.3±7.0     |             | 33.9±5.6     | 31.9±5.0      | 32.6±4.1   |
| d14 7  | 2     | 29.5±6.8     | 31.5±6.2     |             | 41.0±4.6     | 41.8±2.6      | 32.9±5.0   |
| d14 8  | 2     | 32.8±6.6     | 32.0±6.0     |             | 34.6±4.3     | 28.3±3.9      | 28.8±4.5   |
| d17 E1 | 3     | 36.1±7.1     | 32.4±10.4    | 36.7±6.2    | 47.5±5.5     | 42.0±3.5      | 45.4±4.1   |
| d17 E2 | 3     | 33.7±7.6     | 30.3±5.0     | 32.2±4.8    | 37.5±4.1     | 40.1±5.2      | 46.0±5.3   |
| d17 E3 | 3     | 33.3±5.7     | 47.9±8.3     |             | 61.6±7.8     | 57.5±5.5      | 56.8±11.4  |

|         |   |          |          |          |           |          |          |
|---------|---|----------|----------|----------|-----------|----------|----------|
| d17 E4  | 3 | 40.8±4.6 | 40.6±7.3 | 31.4±5.0 | 32.4±7.6  | 28.1±3.5 | 26.4±2.7 |
| d17 E5  | 3 | 30.7±3.9 |          |          | 32.8±7.6  | 36.6±4.6 | 28.3±3.1 |
| d17 E6  | 3 | 33.8±6.8 | 29.4±6.3 | 34.9±5.6 | 28.7±4.0  | 29.0±2.6 | 23.5±3.7 |
| d17 E7  | 3 | 43.4±5.1 |          | 33.9±3.5 | 35.9±4.2  | 31.0±2.2 | 30.6±4.2 |
| d17 E8  | 3 | 35.1±6.2 | 35.1±6.5 | 28.7±3.8 | 33.5±4.1  | 30.2±3.0 | 30.8±4.2 |
| d17 E9  | 3 | 37.8±3.9 | 34.9±5.6 | 32.0±3.9 | 34.7±4.2  | 34.2±2.5 | 30.9±3.6 |
| d17 E10 | 3 | 34.7±4.9 | 32.5±6.0 | 33.4±3.6 | 33.6±4.3  | 28.0±3.1 | 34.5±4.7 |
| d17 TP1 | 4 | 37.2±6.6 | 28.3±7.0 | 31.3±3.8 | 35.1±4.2  | 24.1±3.3 | 23.1±4.4 |
| d17 TP2 | 4 | 7.3±5.9  | 26.6±6.7 |          | 26.3±3.3  | 25.0±2.3 | 19.8±3.1 |
| d17 TP3 | 4 |          | 32.9±5.8 | 31.8±3.7 | 39.3±4.9  | 25.0±1.9 | 32.6±4.2 |
| d17 TP4 | 4 |          |          | 27.5±4.1 | 33.0±9.5  | 22.2±2.4 | 30.8±4.0 |
| d17 TP5 | 4 | 36.4±6.6 | 31.9±6.4 | 33.8±4.5 | 38.5±4.5  | 22.8±2.8 | 29.1±4.3 |
| d17 TP6 | 4 | 36.7±9.3 | 32.1±7.7 | 30.1±3.4 | 34.7±8.8  | 24.2±3.2 | 28.6±4.2 |
| d17 TE1 | 5 | 33.8±6.5 | 28.8±6.2 | 38.5±6.4 | 30.8±3.8  | 23.7±2.9 | 20.3±3.1 |
| d17 TE2 | 5 |          |          | 24.1±7.8 | 28.7±3.9  | 28.0±3.5 | 19.4±3.7 |
| d17 TE3 | 5 | 35.1±5.4 | 32.3±5.8 | 33.3±3.8 | 40.7±5.1  | 25.2±2.5 | 26.0±3.8 |
| d17 TE4 | 5 | 32.3±5.7 |          | 29.2±4.4 | 34.5±4.2  | 25.1±3.0 | 28.4±3.7 |
| d17 TE5 | 5 | 36.8±6.3 | 33.8±9.2 |          | 30.3±9.7  | 24.6±2.7 | 23.1±3.4 |
| d17 TE6 | 5 | 38.9±5.5 |          |          | 30.5±10.2 | 22.5±2.3 | 26.1±3.8 |
| d25 1   | 6 | 39.2±6.7 |          | 33.2±5.7 | 36.1±4.0  | 17.0±1.2 | 29.3±5.1 |
| d25 2   | 6 | 39.8±5.6 | 25.1±6.4 | 36.5±6.7 | 36.4±2.7  | 16.3±0.9 | 25.8±4.0 |
| d25 3   | 6 | 37.4±5.9 | 35.4±4.5 | 34.4±4.4 | 36.0±2.9  | 15.9±1.5 | 27.9±4.5 |
| d25 4   | 6 | 40.1±4.4 | 36.8±5.0 | 32.1±2.9 | 39.6±2.7  | 25.9±1.7 | 29.1±4.5 |
| d25 6   | 6 | 39.6±5.9 | 36.6±4.6 | 31.5±2.9 | 38.6±2.2  | 26.4±1.7 | 29.6±4.2 |

|           |   |          |          |          |          |          |          |
|-----------|---|----------|----------|----------|----------|----------|----------|
| d25 7     | 6 | 40.6±5.3 | 40.5±5.0 | 29.8±2.8 | 39.3±2.4 | 25.6±2.1 | 29.1±4.7 |
| d25 8     | 6 | 31.6±3.5 | 32.8±4.7 | 30.3±3.6 |          | 25.5±2.0 | 25.1±4.1 |
| d25tro 1  | 7 | 33.0±1.8 | 35.4±4.7 | 31.1±2.8 | 40.3±2.8 | 24.5±1.6 | 26.8±4.0 |
| d25 tro 2 | 7 | 33.3±1.8 | 34.1±4.3 | 31.9±3.0 | 39.9±2.6 | 23.9±2.1 | 26.0±4.0 |
| d25 tro 3 | 7 | 36.4±8.6 | 36.1±5.1 | 32.2±2.9 | 39.4±2.5 | 25.5±2.1 | 26.8±3.9 |
| d25 tro 4 | 7 | 37.1±3.3 | 37.0±4.2 |          | 39.4±2.5 | 25.0±1.9 | 28.5±4.4 |
| d25 tro 5 | 7 | 33.9±1.4 | 38.3±4.8 | 32.6±3.0 | 40.3±2.3 | 25.5±1.9 | 29.1±4.5 |

Individual methylation values for six bovine imprinted gene differentially methylation regions in day 7 blastocysts, day 14 hatched ovoid embryos, day 17 filamentous embryos and day 25 implanting conceptii. ± values represent standard deviation for the average methylation of a given DMR within each sample.
