# Supplementary material for: DNA methylation dynamics at imprinted genes during bovine pre-implantation embryo development
Source: PubMed Central journal article supplement (PMC4363183; doi:10.1186/s12861-015-0060-2), 2015-03-10
Supplement: 12861_2015_60_MOESM6_ESM.pdf [file 12861_2015_60_MOESM6_ESM.pdf]

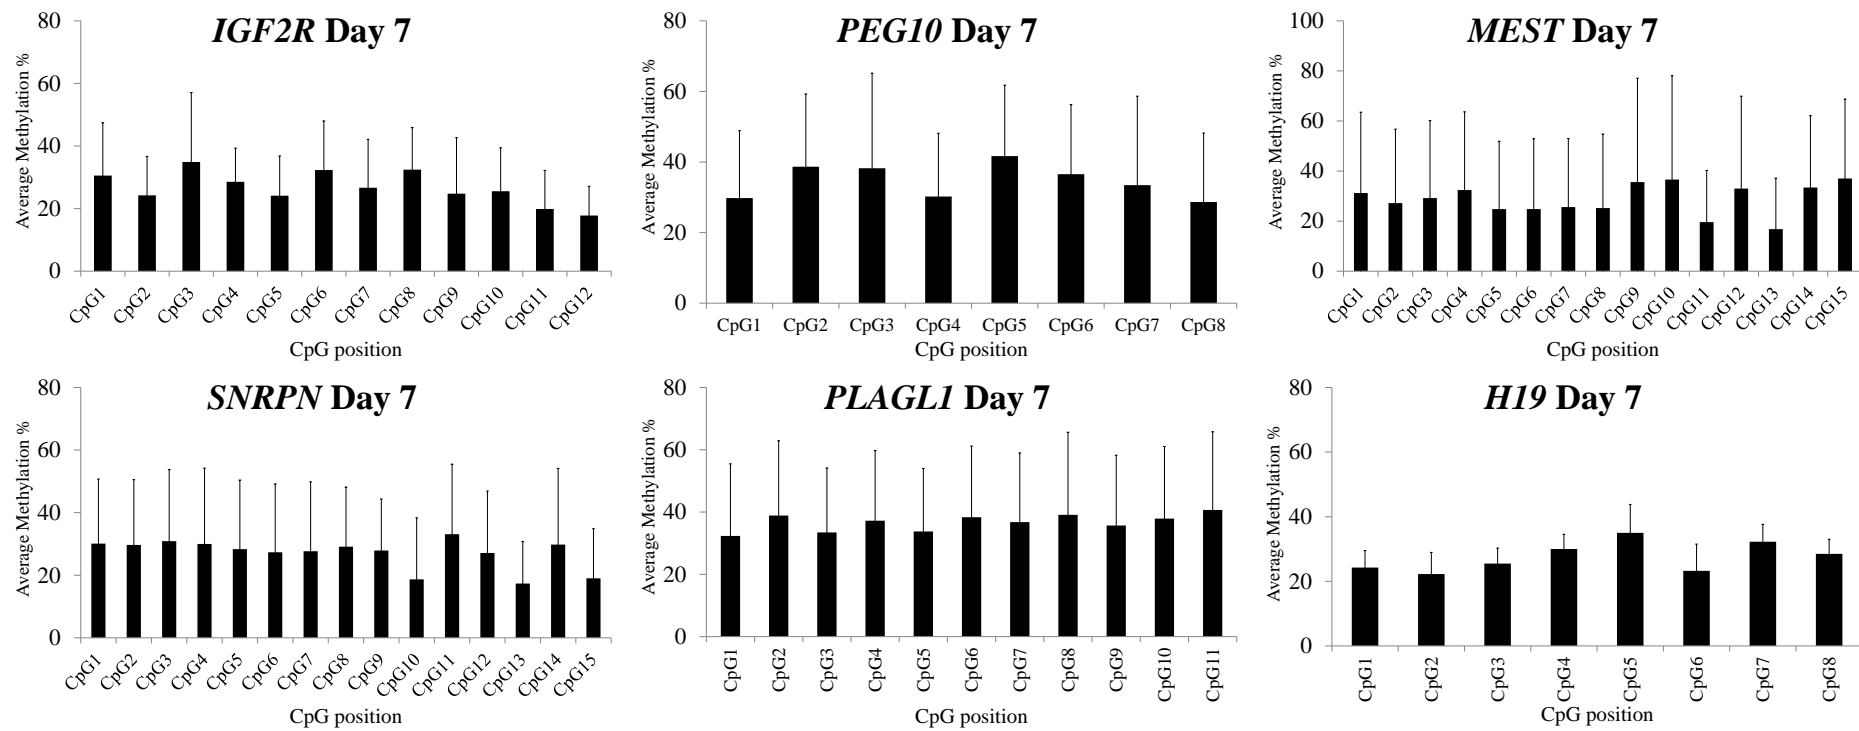

Figure S2. D7 individual CpG methylation analysis.
